# Supplementary material for: A universal and accurate LPMI method for calculating mismatch in heterogeneous ice nucleation
Source: Royal Society of Chemistry journal article supplement (doi:10.1039/d4cp00748d), 2024-01-01
Supplement: d4cp00748d1.pdf [file d4cp00748d1.pdf]

1

2

## Supporting information

3

### 4 **A universal and accurate LPMI-calculating-method for** 5 **mismatch in heterogeneous ice nucleation**

6 Qiyuan Deng<sup>1,2</sup>, Hong Wang<sup>1,2</sup>, Xun Zhu<sup>1,2</sup>, Junjun Wu<sup>1,2</sup>, Yudong Ding<sup>1,2</sup>, Rong

7 Chen<sup>1,2</sup>, Qiang Liao<sup>1,2\*</sup>

8 <sup>1</sup>Key Laboratory of Low-grade Energy Utilization Technologies and Systems, Ministry  
9 of Education, Chongqing University, Chongqing 400030, China.

10 <sup>2</sup>Institute of Engineering Thermophysics, School of energy and power engineering,  
11 Chongqing University, Chongqing 400030, China

12 \*Corresponding author. Tel.: 0086-23-65102474; fax: 0086-23-65102474; e-mail:  
13 [lqzx@cqu.edu.cn](mailto:lqzx@cqu.edu.cn)

14

15 **◆ Supporting Tables S1-S3**

16 **◆ Supporting Figures S1-S**

17 **◆ Reference**

18

19

20

21 **Experimental Section**

22

**Table S1.** The definitions of the mismatch  $\delta$

| Reference                                                                                       | Parameter                                                                           | $\delta$                                |
|-------------------------------------------------------------------------------------------------|-------------------------------------------------------------------------------------|-----------------------------------------|
| David and Bernard <sup>1</sup><br>Martin and Angelos <sup>2</sup><br>Liu and Huang <sup>3</sup> | 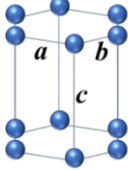   | $\delta_1 = \frac{a_i - a_s}{a_i}$      |
| Purppacher <sup>4</sup>                                                                         |    | $\delta_2 = \frac{na_n - ma_i}{ma_i}$   |
| Abhishek and Patey <sup>5</sup>                                                                 |   | $\delta_{2D} = \frac{ d_i - d_s }{d_i}$ |
| This investigation                                                                              |  | $\delta_d = 2(d_i - d_s) / (d_i + d_s)$ |

23 The  $\delta$  measures the relative size of the lattice constants of the materials used compared  
 24 to those of the substrate material. For heterogenous ice nucleation,  $\delta$  denotes the  
 25 difference in lattice constants of ice and substrate. For  $\delta_1$  and  $\delta_2$ ,  $a$  is the lattice  
 26 parameter. For  $\delta_{2D}$ ,  $d$  refers distances between two adjacent and congener atoms on the  
 27 same plane for ice and substrate. For  $\delta_d$ ,  $d$  refers the interplanar spacing of the crystal  
 28 panel. The subscripts s and i are substrate and ice, respectively.

29

30

**Table S2.** Unit cell parameters for crystal structures

| Crystal                                               | Unit cell    | a (Å) | b (Å) | c (Å) | $\alpha$ (°) | $\beta$ (°) | $\gamma$ (°) |
|-------------------------------------------------------|--------------|-------|-------|-------|--------------|-------------|--------------|
| Ice <sup>6,7</sup>                                    | Hexagonal    | 4.506 | 4.506 | 7.346 | 90           | 90          | 120          |
| $\alpha$ -Al <sub>2</sub> O <sub>3</sub> <sup>8</sup> | Hexagonal    | 4.75  | 4.75  | 12.98 | 90           | 90          | 120          |
| Silicon <sup>9</sup>                                  | Cubic        | 5.43  | 5.43  | 5.43  | 90           | 90          | 90           |
| $\beta$ -AgI <sup>10</sup>                            | Hexagonal    | 4.6   | 4.6   | 7.51  | 90           | 90          | 120          |
| PbI <sub>2</sub> <sup>11</sup>                        | Hexagonal    | 4.56  | 4.56  | 13.97 | 90           | 90          | 120          |
| Gibbsite <sup>12</sup>                                | Monoclinic   | 8.69  | 5.08  | 9.74  | 90           | 90.54       | 90           |
| Kaolinite <sup>13</sup>                               | Triclinic    | 5.15  | 8.94  | 7.39  | 91.93        | 105.05      | 89.8         |
| Mica <sup>14</sup>                                    | Monoclinic   | 5.19  | 9.03  | 20.11 | 90           | 95.782      | 90           |
| Hematite <sup>15</sup>                                | Hexagonal    | 5.03  | 5.03  | 13.75 | 90           | 90          | 120          |
| Boehmite <sup>16</sup>                                | Orthorhombic | 2.85  | 12.12 | 3.74  | 90           | 90          | 90           |
| AsI <sup>5</sup>                                      | Hexagonal    | 4.506 | 4.506 | 12.98 | 90           | 90          | 120          |
| AsH <sup>5</sup>                                      | Hexagonal    | 5.03  | 5.03  | 13.75 | 90           | 90          | 120          |
| HsI <sup>5</sup>                                      | Hexagonal    | 4.506 | 4.506 | 13.75 | 90           | 90          | 120          |

32 AsI, AaH, and HsI are imitated crystal structures. AsI refers to scaling  $\alpha$ -Al<sub>2</sub>O<sub>3</sub> to the  
33 ice basal plane. AsH refers to scaling  $\alpha$ -Al<sub>2</sub>O<sub>3</sub> to hematite in the basal plane. HsI refers  
34 to scaling hematite to ice (HsI), reducing mismatch to zero for the basal plane

**Table S3** the potential for water molecules and temperature

| Surface label                 | Potential for water molecules | T (K) | Water-substrate interaction | Ensembles | Number of molecules |
|-------------------------------|-------------------------------|-------|-----------------------------|-----------|---------------------|
| $\beta$ -AgI <sup>5,17</sup>  | TIP4P/Ice                     | 230   | CLAYFF                      | NPT       | 1350                |
|                               | Six-site                      | 240   |                             |           |                     |
| Kaolinite <sup>5,18</sup>     | TIP4P/Ice                     | 230   | CLAYFF                      | NPT       | 1450                |
|                               | Six-site                      | 240   |                             |           |                     |
| Mica <sup>5,19</sup>          | TIP4P/Ice                     | 230   | CLAYFF                      | NPT       | 6630                |
| PbI <sub>2</sub> <sup>5</sup> | TIP4P/Ice                     | 230   | CLAYFF                      | NPT       | 1350                |
|                               | Six-site                      | 240   |                             |           |                     |
| Gibbsite <sup>5,20</sup>      | TIP4P/Ice                     | 230   | CLAYFF                      | NPT       | 1000                |
|                               | Six-site                      | 240   |                             |           |                     |
| Hematite <sup>5,21</sup>      | TIP4P/Ice                     | 230   | CLAYFF                      | NPT       | 1600                |
|                               | Six-site                      | 240   |                             |           |                     |
| Boehmite <sup>5</sup>         | TIP4P/Ice                     | 230   | CLAYFF                      | NPT       | 1670                |
| AsI <sup>5</sup>              | TIP4P/Ice                     | 230   | LJ                          | NPT       | 1280                |
| AsH <sup>5</sup>              | TIP4P/Ice                     | 230   | LJ                          | NPT       | 1445                |
| HsI <sup>5</sup>              | TIP4P/Ice                     | 230   | LJ                          | NPT       | 1130                |

**Table S4.** The freezing delay time in MD simulation

| Surface label | Kaolinite <sup>18</sup> | KaoniSi <sup>5</sup> | $\beta$ -AgI <sup>17</sup> | PbI <sub>2</sub> <sup>5</sup> | $\alpha$ -Al <sub>2</sub> O <sub>3</sub> <sup>8</sup> | AsI <sup>5</sup> | AsI(Fe) <sup>5</sup> | HsI <sup>5</sup> | HsI(Fe) <sup>5</sup> |
|---------------|-------------------------|----------------------|----------------------------|-------------------------------|-------------------------------------------------------|------------------|----------------------|------------------|----------------------|
| Time (ns)     | 400                     | 430                  | 80                         | 60                            | 520                                                   | 360              | 310                  | 500              | 250                  |

39 KaoniSi is produced by Kaolinite removing a layer of Si atoms. AsI, and HsI are  
40 imitated crystal structures. Scaling  $\alpha$ -Al<sub>2</sub>O<sub>3</sub> to hematite (referred to as AsH) increases  
41 the mismatch for the basal plane. Scaling hematite to ice (referred to as HsI) eliminates  
42 the mismatch on the basal plane. AsI(Fe) and HsI(Fe) are AsI and HsI using Fe LJ  
43 forcefield for water-substrate interaction.

44

45

---

46 **Materials and methods in experiment**

47 The experiment system is shown in **Figure S1**. The semiconductor cooler (Ruipu  
48 China) is utilized to cool and maintain the substrate at a specific temperature. The  
49 plexiglass chamber on the cooler is used to maintain the relative humidity of the  
50 freezing environment. The temperature is measured by the thermocouples (Omega  
51 USA) and data logger (Agilent USA). The charge-coupled device (CCD) camera  
52 (Navitar USA) captures and records the freezing process at 25 fps (frames per second).  
53 The experimental steps are as follows.

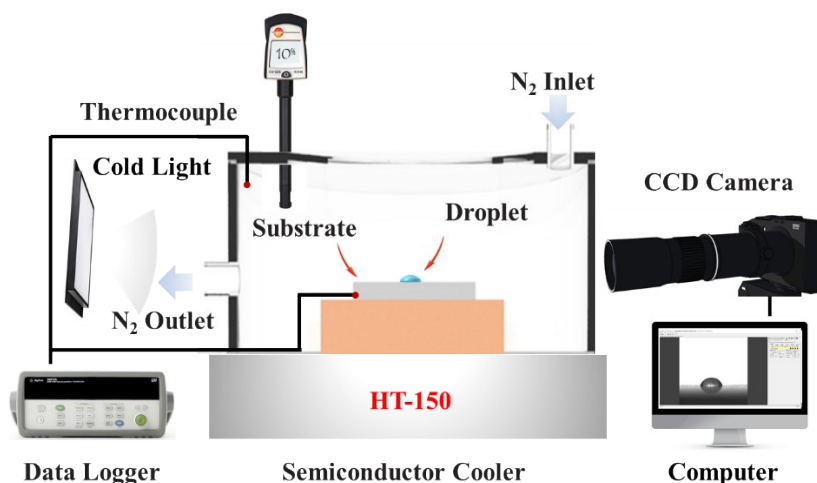

54

55

**Figure S1.** Schematic diagram of the experimental system

56

57 10  $\mu$ L droplets were pipetted onto the substrate by a pipette. Subsequently, N<sub>2</sub> was  
58 introduced through the gas inlet of the plexiglass cavity until the relative humidity  
59 inside the chamber was below 10%. The relative humidity in the chamber was measured  
60 by a hygrometer. Cool the substrate to the target temperature at a cooling rate of 2.8  
61  $^{\circ}$ C/min. However, for individual droplets, freezing is a random event. Thus, more than  
62 10 freezing experiments were performed on the same substrate. Wherein the

---

63 monocrystalline silicon wafers (with Miller index of (100), (110) and (111)) and  $\alpha$ -  
64 Al<sub>2</sub>O<sub>3</sub> flakes (with Miller index of M-plane (10 $\bar{1}$ 0), A-plane (11 $\bar{2}$ 0) and C-plane  
65 (0001)) were selected as heterogenous nucleation substrates. The thickness of silicon  
66 wafer and  $\alpha$ -Al<sub>2</sub>O<sub>3</sub> flake are 500  $\mu\text{m} \pm 10 \mu\text{m}$  and 430  $\mu\text{m} \pm 10 \mu\text{m}$ , respectively (Suzhou  
67 Research Materials Microtech Co., Ltd, China). The surfaces of the substrates were  
68 prime polished. Before experiments, the surface properties should be characterized. The  
69 wettability was observed on an optical contact-angle goniometer (Xuanyi, China).  
70 Surface morphology was observed with a scanning electronic microscope (SEM,  
71 HITACHI, Japan), and the roughness was measured using an atomic force microscope  
72 (AFM, Asylum, USA). The contact angle of 5  $\mu\text{L}$  water droplet was measured as shown  
73 in **Figure S2**. Moreover, the SEM and AFM of the substrate surface morphology are  
74 shown in **Figure S2**. The AFM measurement (**Figure S3**) indicates that  $R_a$  of the  
75 substrates is located at 400-600 pm, which is an order of magnitude smaller than the  
76 critical nucleation radius  $R_c$  (4-11 nm) at the experimental subcooling, namely  $R_a < R_c$ .  
77 The interfacial correlation factor  $f(m,x)$  in the heterogenous nucleation can be treated as  
78  $f(m,x) = (2 - 3m + m^3) / 4$ <sup>22, 23</sup>. Therefore, interfacial correlation factor  $f$  is primarily  
79 influenced by  $m$ . In summary, the effect of heterogeneous nucleation in our experiment  
80 depends on the free energy differences between water and the crystal phase of the  
81 substrate, namely,  $m$  in  $f$ , which is determined by the interaction strength and the  
82 structure match<sup>22</sup>. The interaction strength between the same materials can be regarded  
83 as identical. Different Miller indices result in different crystal plane structures in contact  
84 with water. This study mainly compares the freezing delay times of droplets on silicon

85 wafers and  $\alpha$ -Al<sub>2</sub>O<sub>3</sub> flake with different Miller indices under different supercooling

86 degrees. All experiments were repeated 15 times to reduce random errors.

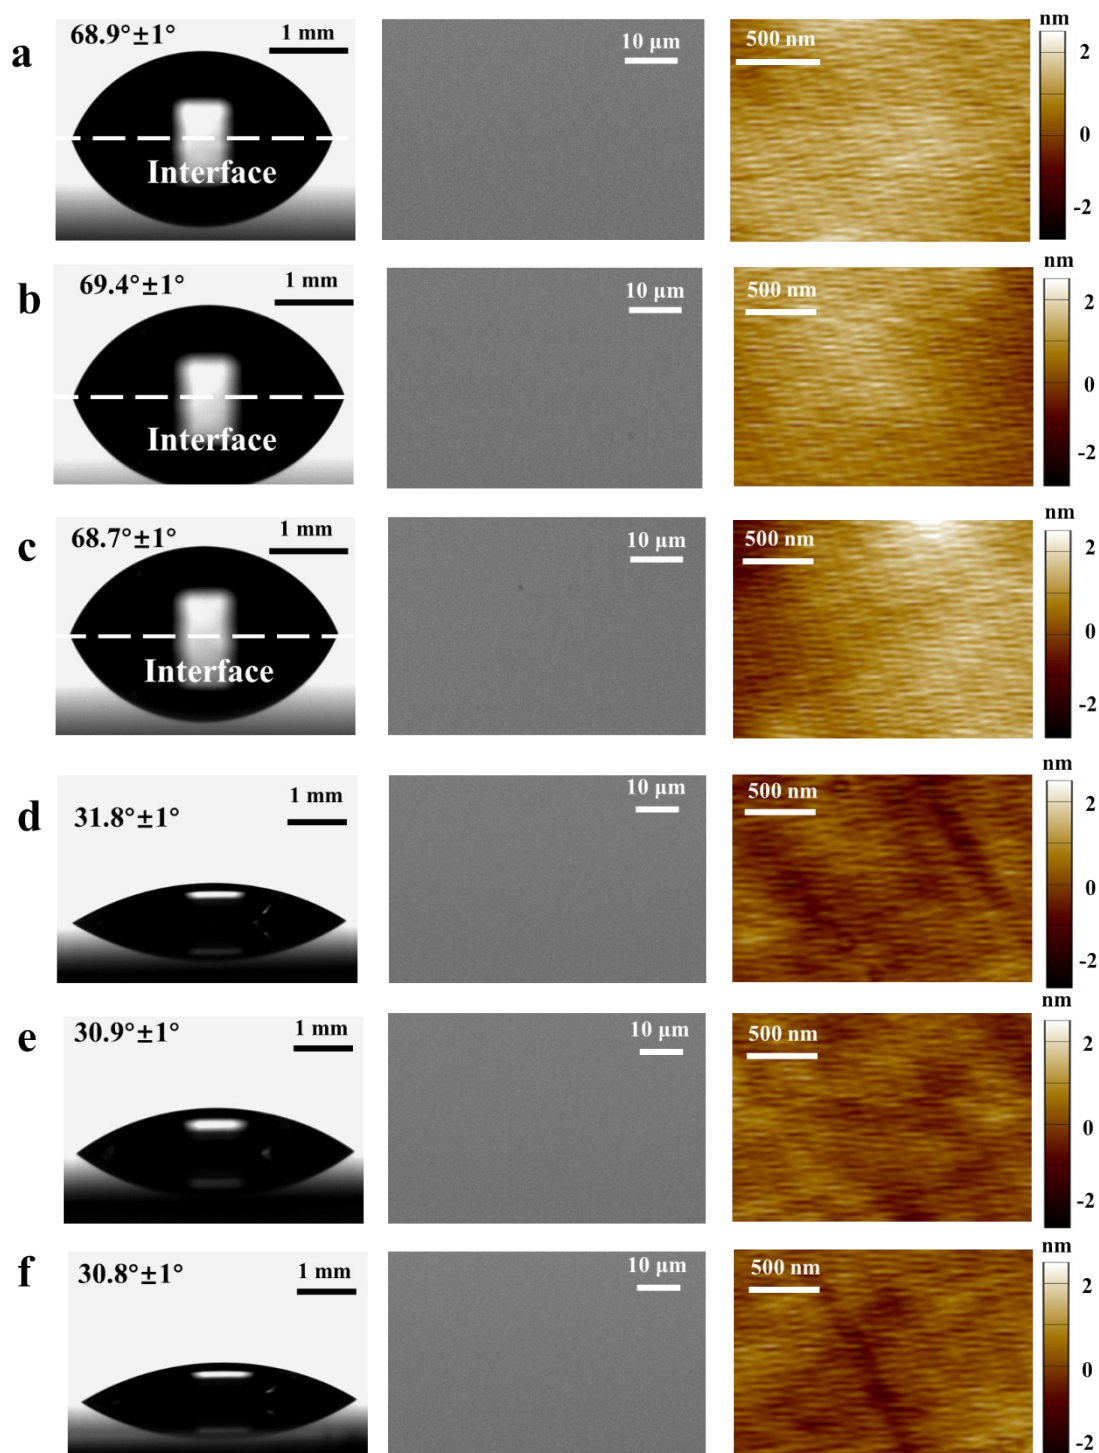

87

88 **Figure S2.** The contact angle, SEM and AFM of the substrates. (a) silicon wafer (100),  
89 (b) silicon wafer (110), (c) silicon wafer (111), (d)  $\alpha$ -Al<sub>2</sub>O<sub>3</sub> (A-plane), (e)  $\alpha$ -Al<sub>2</sub>O<sub>3</sub> (M-  
90 plane), (f)  $\alpha$ -Al<sub>2</sub>O<sub>3</sub> (C-plane). Figures in the first column show the contact angle of a 5



91  $\mu\text{L}$  droplet on the substrate. Figures in the second column show the SEM image of the  
92 substrates. Figures in the third column show the AFM image of the substrates.

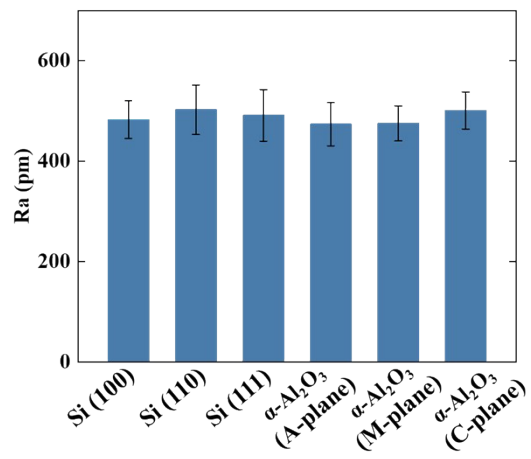

93  
94  
95

**Figure S3.** The surface roughness  $R_a$  of the substrates

---

## 96 Reference

- 97 1. D. Turnbull and B. Vonnegut, *Industrial & Engineering Chemistry*, 1952, **44**, 1292-  
98 1298.
- 99 2. M. Fitzner, G. C. Sosso, S. J. Cox and A. Michaelides, *Journal of the American*  
100 *Chemical Society*, 2015, **137**, 13658-13669.
- 101 3. Z. Liu, C. Li, E. C. Goonetilleke, Y. Cui and X. Huang, *The Journal of Physical*  
102 *Chemistry C*, 2021, **125**, 18857-18865.
- 103 4. M. Wendisch, *Journal of Atmospheric Chemistry*, 1999, **32**, 420-422.
- 104 5. A. Soni and G. N. Patey, *The Journal of Physical Chemistry C*, 2021, **125**, 10723-  
105 10737.
- 106 6. A. Goto, T. Hondoh and S. J. Mae, *Journal of Chemical Physics*, 1990, **93**, 1412-  
107 1417.
- 108 7. G. Malenkov, *Journal of Physics-Condensed Matter*, 2009, **21**.
- 109 8. E. N. Maslen, V. A. Streltsov, N. R. Streltsova, N. Ishizawa and Y. Satow, *Acta*  
110 *Crystallographica Section B-Structural Science*, 1993, **49**, 973-980.
- 111 9. P. Becker, P. Seyfried and H. Siebert, *Zeitschrift Fur Physik B-Condensed Matter*,  
112 1982, **48**, 17-21.
- 113 10. R. J. Cava, F. Reidinger and B. J. Wuensch, *Solid State Communications*, 1977, **24**,  
114 411-416.
- 115 11. L. H. Brixner, H. Y. Chen and C. M. Foris, *Journal of Solid State Chemistry*, 1981,  
116 **40**, 336-343.
- 117 12. D. A. Ksenofontov and Y. K. Kabalov, *Inorganic Materials*, 2012, **48**, 142-144.
- 118 13. D. L. Bish, *Clays and Clay Minerals*, 1993, **41**, 738-744.
- 119 14. A. Soni and G. N. Patey, *Journal of Physical Chemistry C*, 2021, **125**, 26927-26941.
- 120 15. Y. El Mendili, J. F. Bardeau, N. Randrianantoandro, F. Grasset and J. M. Greneche,  
121 *Journal of Physical Chemistry C*, 2012, **116**, 23785-23792.
- 122 16. X. Bokhimi, J. A. Toledo-Antonio, M. L. Guzman-Castillo and F. Hernandez-  
123 Beltran, *Journal of Solid State Chemistry*, 2001, **159**, 32-40.
- 124 17. A. Soni and G. N. Patey, *The Journal of Physical Chemistry C*, 2022, **126**, 6716-  
125 6723.
- 126 18. G. C. Sosso, T. Li, D. Donadio, G. A. Tribello and A. Michaelides, *The Journal of*  
127 *Physical Chemistry Letters*, 2016, **7**, 2350-2355.
- 128 19. A. Soni and G. N. Patey, *The Journal of Physical Chemistry C*, 2021, **125**, 26927-  
129 26941.
- 130 20. E. Chong, M. King, K. E. Marak and M. A. Freedman, *The Journal of Physical*  
131 *Chemistry A*, 2019, **123**, 2447-2456.
- 132 21. N. Hiranuma, N. Hoffmann, A. Kiselev, A. Dreyer, K. Zhang, G. Kulkarni, T. Koop  
133 and O. Möhler, *Atmos. Chem. Phys.*, 2014, **14**, 2315-2324.
- 134 22. Z. Zhang and X.-Y. Liu, *Chemical Society Reviews*, 2018, **47**, 7116-7139.
- 135 23. Z. Huang, S. Kaur, M. Ahmed and R. Prasher, *ACS Applied Materials & Interfaces*,  
136 2020, **12**, 45525-45532.
- 137
